# Supplementary material
Source: Elsevier journal article supplement (https://www.sciencedirect.com/science/article/pii/S2173574318301369)
Supplement: mmc1 [file S2173574318301369:mmc1.pdf]

## Anexo 1. Cuestionario empleado en la primera llamada

### Introducción

Buenos días/tardes.

La Sociedad Española de Reumatología está llevando a cabo el estudio EPISER 2016, para conocer el número de personas que tienen enfermedades reumáticas en España.

El motivo de esta llamada es realizar un breve cuestionario en el que se recogen datos personales y sobre su salud. Su participación en el estudio puede ser muy valiosa, tanto si ha sentido alguna molestia física como si no la ha tenido. Le informamos que la llamada será grabada y que, en cualquier caso, la participación en este estudio es completamente voluntaria.

S.0 ¿Acepta responder a estas preguntas?

No → **FIN ENTREVISTA**

Sí → **CONTINUAR**

Código de identificación del sujeto

### Filtro v cuotas de edad v sexo

1. ¿Reside habitualmente en... *(incluir nombre del municipio)*?

1. Sí → **CONTINUAR**

0. No → **FIN DE ENTREVISTAS**

2. Edad

*(Si menor de 20, finalizar entrevista)*

3. Sexo

1. Hombre 2. Mujer

## Estudio de prevalencia de las enfermedades reumáticas en la población adulta en España

**Cuestionario (lo escrito entre paréntesis y en cursiva en la redacción de algunas preguntas son aclaraciones a utilizar en caso de que el entrevistado no entienda la pregunta o dé una respuesta confusa)**

4. En los últimos doce meses, ¿diría que su estado de salud ha sido muy bueno, bueno, regular, malo o muy malo?

1. Muy bueno 2. Bueno 3. Regular 4. Malo 5. Muy malo

5. ¿Ha acudido o pedido cita en el último año a algún médico por algún problema de huesos o articulaciones?

0. No 1. Sí

SÓLO SI P5=1

6. ¿De qué especialidades?

|                         |   |                                                                   |   |                     |   |
|-------------------------|---|-------------------------------------------------------------------|---|---------------------|---|
| Urgencias               | 1 | Médico general/médico de familia/de cabecera/de Atención Primaria | 2 | Reumatólogo         | 3 |
| Traumatólogo            | 4 | Médico rehabilitador                                              | 5 | Internista          | 6 |
| Neurólogo/neurocirujano | 7 | Otra especialidad                                                 | 8 | No sabe/No contesta | 9 |

7. En el último año, ¿ha tomado alguna medicación durante un mes o más por algún problema de huesos o articulaciones?

0. No 1. Sí

*Nota: con "tomado" nos referimos a medicaciones de administración oral o subcutánea (pinchada o infiltrada), no a geles, cremas...*

SÓLO SI P7=1

8. ¿Recuerda el nombre del medicamento?

9. ¿Le ha dicho su médico que tiene alguna enfermedad reumática o de los huesos o de las articulaciones?

0. No 1. Sí

10. ¿Le ha dicho su médico que tiene alguna de las siguientes enfermedades?

|                                      |   |                                         |   |                           |   |
|--------------------------------------|---|-----------------------------------------|---|---------------------------|---|
| Artritis reumatoide                  | 1 | Espondilitis anquilosante               | 2 | Artritis psoriásica       | 3 |
| Lupus (que afecte no sólo a la piel) | 4 | Artrosis/desgaste de las articulaciones | 5 | Fibromialgia              | 6 |
| Gota                                 | 7 | Síndrome de Sjögren o síndrome seco     | 8 | Ninguna de las anteriores | 0 |

SÓLO SI P10=5

11. ¿En qué parte/s del cuerpo le ha dicho su médico que tiene artrosis?

|                    |   |                |   |           |   |
|--------------------|---|----------------|---|-----------|---|
| Cervical/de cuello | 1 | Columna/lumbar | 2 | Cadera    | 3 |
| Rodilla            | 4 | Manos          | 5 | Otra zona | 6 |

## Estudio de prevalencia de las enfermedades reumáticas en la población adulta en España

SÓLO SI P10≠0. REPETIR PARA CADA OPCIÓN MARCADA EN P10 EXCEPTO SI LA ÚNICA RESPUESTA EN P11 ES CÓDIGO 6

12. ¿Podría darnos el nombre del centro en el que recibe atención para el tratamiento del/ de la .... *(insertar respuesta en P10)*?
13. ¿Podría decirnos en qué especialidad le atienden del /de la... *(insertar respuesta en P10)*?

|                   |   |                   |   |                     |   |
|-------------------|---|-------------------|---|---------------------|---|
| Reumatología      | 1 | Traumatología     | 2 | Medicina interna    | 3 |
| Médico de familia | 4 | Otra especialidad | 5 | No sabe/No contesta | 9 |

14. ¿Podría decirnos el nombre del médico que le atiende habitualmente del /de la... *(insertar respuesta en P10)*?
- 

15. ¿Se ha roto, de adulto, algún hueso sin que fuese por un accidente de tráfico o golpe fuerte? *(PREGUNTAR SÓLO SI EDAD ≥ 40)*

0. No 1. Sí

*SÓLO SI P15=1*

16. ¿En qué centro le atendieron?

17. ¿Le han puesto alguna prótesis de cadera o rodilla? *(PREGUNTAR SÓLO SI EDAD ≥ 40)*

0.No 1. De cadera 2. De rodilla 3. De cadera y rodilla

*Nota: Si el entrevistado dice que le operaron de la cadera, aunque no hable de que le pusieran prótesis de cadera, considerarlo un sí. Para rodilla tener en cuenta sólo si le han puesto prótesis.*

*SÓLO SI P17=1 o P17=3*

18. La prótesis de cadera, ¿fue por artrosis/desgaste o por fractura/caída?

1.Artrrosis 2.Fractura

*SÓLO SI P17=1 o P17=3*

19. ¿En qué centro le han puesto la prótesis/le han operado de cadera?

*SÓLO SI P17=2 OR P17=3*

20. ¿En qué centro le han puesto la prótesis de rodilla?

21. ¿Siente dolor (*dolor generalizado, "le duele todo el cuerpo"*) en la mayor parte de su cuerpo? 0. No 1. Sí

*SÓLO SI P21=1*

22. ¿Lleva al menos 3 meses con este dolor? 0. No 1. Sí

*SÓLO SI P22=1*

23. ¿Le duele porque ha tenido algún accidente, traumatismo o golpe? 0. No 1. Sí

24. ¿Tiene o ha tenido dolor de cuello/cervicales (*dolor en la nuca, en la parte de atrás del cuello*) sin que haya sido por una caída / golpe o sobreesfuerzo (*es decir, el dolor no está relacionado con ninguna caída, golpe o sobreesfuerzo*)? *(SÓLO SI EDAD ≥ 40)*

0. No 1. Sí

*SÓLO SI P24=1*

## Estudio de prevalencia de las enfermedades reumáticas en la población adulta en España

25. ¿Ha durado ese dolor 3 o más meses seguidos, aunque el dolor no sea fijo / tenga altibajos? 0. No 1. Sí

SÓLO SI P25=1

26. ¿Empeora al mover el cuello o girar la cabeza? 0. No 1. Sí

*Nota: si indica que "a veces" o "parece que sí", no insistir y marcar "sí".*

27. ¿Tiene o ha tenido dolor de la parte baja de la espalda/cintura/espalda a la altura de los riñones/lumbares (*es el dolor de lumbago o lumbalgia*) sin que haya sido por una caída / golpe o sobreesfuerzo (*es decir, el dolor no está relacionado con ninguna caída, golpe o sobreesfuerzo*)? 0. No 1. Sí

SÓLO SI P27=1

28. ¿Ha durado ese dolor 3 o más meses seguidos, aunque el dolor no sea fijo / tenga altibajos? 0. No 1. Sí

SÓLO SI P28=1

29. ¿Empeora al coger peso o hacer esfuerzos (*si cuando levanta peso o cuando trabaja mucho, se encuentra peor*)? 0. No 1. Sí

*Nota: si indica que "a veces" o "parece que sí", no insistir y marcar "sí".*

SÓLO SI P28=1

30. ¿Mejora con la actividad física y el ejercicio (*tiene el dolor, pero después de estar un rato moviéndose, se le alivia*)? 0. No 1. Sí

*Nota: si indica que "a veces" o "parece que sí", no insistir y marcar "sí".*

*Nota: En caso de obtener la misma respuesta a las cuestiones 29 y 30 (sí a las dos o no a las dos), confirmar con el entrevistado/a la comprensión de la pregunta.*

SÓLO SI P28=1

31. ¿Mejora con el reposo (*se encuentra mejor cuando está sentado o acostado*)?

0. No 1. Sí

*Nota: si indica que "a veces" o "parece que sí", no insistir y marcar "sí".*

SÓLO SI P28=1

32. ¿Le despierta el dolor por la noche? 0. No 1. Sí

SÓLO SI P28=1

33. Este dolor de la parte baja de la espalda/cintura/espalda a la altura de los riñones/lumbares (*es el dolor de lumbago o lumbalgia*), ¿empezó antes de los 45 años?

0. No 1. Sí

34. ¿Le duele o le ha dolido el talón (*la zona de detrás del tobillo, el calcáneo o calcañar*), o lo ha notado hinchado, sin que haya sido por un golpe o sobreesfuerzo?

*Nota: si indica que "a veces" o "parece que sí", no insistir y marcar "sí". Si la persona comenta que le dijeron que era por un espolón, marcar "No" como respuesta.*

0. No 1. Sí

35. ¿Tiene o ha tenido dolor en alguna articulación sin que haya sido por una caída / golpe o un sobreesfuerzo (*es decir, el dolor no está relacionado con ninguna caída, golpe o sobreesfuerzo*)? 0. No 1. Sí

SÓLO SI P35=1

36. ¿Durante más de 4 semanas seguidas? 0. No 1. Sí

SÓLO SI P36=1

## Estudio de prevalencia de las enfermedades reumáticas en la población adulta en España

37. ¿Alguna vez ha tenido inflamación o hinchazón (*aumento de volumen o mayor tamaño*) de alguna de esas articulaciones con dolor durante más de 4 semanas seguidas? 0. No 1. Sí

### SÓLO SI P36=1

Sin que haya sido por una caída/golpe o un sobreesfuerzo, ¿en cuál/es de las siguientes articulaciones ha tenido ese dolor durante más de 4 semanas seguidas?

|  |                    | <u>SÓLO SI CÓDIGO=1</u> |        |                                                                                                                        |        |                            |        |                         |        |
|--|--------------------|-------------------------|--------|------------------------------------------------------------------------------------------------------------------------|--------|----------------------------|--------|-------------------------|--------|
|  |                    | Sí                      | No     | Ese dolor de.... (introducir respuestas con código 1 en P44, P46, P48, P50 y P52. Una pregunta por respuesta) era en.. |        |                            |        |                         |        |
|  | Manos              | P38= 1                  | P38= 0 | Mano derecha                                                                                                           | P39= 1 | Mano izquierda             | P39= 2 | Ambas manos             | P39= 3 |
|  | Caderas/<br>ingles | P40= 1                  | P40= 0 | Cadera/<br>ingle derecha                                                                                               | P41= 1 | Cadera/<br>ingle izquierda | P41= 2 | Ambas<br>caderas/ingles | P41= 3 |
|  | Rodillas           | P42= 1                  | P42= 0 | Rodilla<br>derecha                                                                                                     | P43= 1 | Rodilla<br>izquierda       | P43= 2 | Ambas<br>rodillas       | P43= 3 |
|  | Tobillos           | P44= 1                  | P44= 0 | Tobillo<br>derecho                                                                                                     | P45= 1 | Tobillo<br>izquierdo       | P45= 2 | Ambos<br>tobillos       | P45= 3 |
|  | Pies               | P46= 1                  | P46= 0 | Pie derecho                                                                                                            | P47= 1 | Pie<br>izquierdo           | P47= 2 | Ambos pies              | P47= 3 |

### SÓLO SI P40=1

48. El dolor de cadera/ingle, ¿empeora con el esfuerzo, al caminar o al subir/bajar escaleras (*si cuando levanta peso o cuando trabaja mucho, se encuentra peor*)?

0. No 1. Sí

*Nota: si indica que "a veces" o "parece que sí", no insistir y marcar "Sí".*

### SÓLO SI P40=1

49. ¿Mejora con la actividad física/el ejercicio (*tiene el dolor, pero después de estar un rato moviéndose, se le alivia*)? 0. No 1. Sí

*Nota: si indica que "a veces" o "parece que sí", no insistir y marcar "Sí".*

*Nota: En caso de obtener la misma respuesta a las preguntas 48 y 49 (sí a las dos o no a las dos), confirmar con el entrevistado/a la comprensión de la pregunta.*

### SÓLO 40=1

50. ¿Mejora con el reposo? 0. No 1. Sí

*Nota: si indica que "a veces" o "parece que sí", no insistir y marcar "Sí".*

### SÓLO SI P42=1

51. El dolor de rodilla, ¿empeora con el esfuerzo, al caminar o al subir/bajar escaleras (*si cuando levanta peso o cuando trabaja mucho, se encuentra peor*)?

0. No 1. Sí

*Nota: si indica que "a veces" o "parece que sí", no insistir y marcar "Sí".*

### SÓLO SI P42=1

52. ¿Mejora con la actividad física/el ejercicio (*tiene el dolor, pero después de estar un rato moviéndose, se le alivia*)? 0. No 1. Sí

*Nota: si indica que "a veces" o "parece que sí", no insistir y marcar "Sí".*

## Estudio de prevalencia de las enfermedades reumáticas en la población adulta en España

*Nota: En caso de obtener la misma respuesta a las preguntas 51 y 52 (sí a las dos o no a las dos), confirmar con el entrevistado/a la comprensión de la pregunta.*

### SÓLO SI P42=1

53. ¿Mejora con el reposo (se encuentra mejor cuando está sentado o acostado)?

0. No 1. Sí

*ENTREV: si indica que "a veces" o "parece que sí", no insistir y marcar "Sí".*

### SÓLO SI P44=1

54. El dolor de tobillo, ¿empeora con el esfuerzo, al caminar o al subir/bajar escaleras (si cuando levanta peso o cuando trabaja mucho, se encuentra peor)? 0. No 1. Sí

*Nota: si indica que "a veces" o "parece que sí", no insistir y marcar "Sí".*

### SÓLO SI P44=1

55. ¿Mejora con la actividad física/el ejercicio (tiene el dolor, pero después de estar un rato moviéndose, se le alivia)? 1. Sí 0. No

*Nota: si indica que "a veces" o "parece que sí", no insistir y marcar "Sí".*

*Nota: En caso de obtener la misma respuesta a las preguntas 54 y 55 (sí a las dos o no a las dos), confirmar con el entrevistado/a la comprensión de la pregunta.*

### SÓLO SI P44=1

56. ¿Mejora con el reposo (se encuentra mejor cuando está sentado o acostado)?

0. No 1. Sí

*Nota: si indica que "a veces" o "parece que sí", no insistir y marcar "Sí".*

### SÓLO SI P46=1

57. El dolor de pie, ¿empeora con el esfuerzo, al caminar o al subir/bajar escaleras (si cuando levanta peso o cuando trabaja mucho, se encuentra peor)?

0. No 1. Sí

*Nota: si indica que "a veces" o "parece que sí", no insistir y marcar "Sí".*

### SÓLO SI P46=1

58. ¿Mejora con la actividad física/el ejercicio (tiene el dolor, pero después de estar un rato moviéndose, se le alivia)? 0. No 1. Sí

*Nota: si indica que "a veces" o "parece que sí", no insistir y marcar "Sí".*

*Nota: En caso de obtener la misma respuesta a las preguntas 57 y 58 (sí a las dos o no a las dos), confirmar con el entrevistado/a la comprensión de la pregunta.*

### SÓLO SI P46=1

59. ¿Mejora con el reposo (se encuentra mejor cuando está sentado o acostado)?

0. No 1. Sí

*Nota: si indica que "a veces" o "parece que sí", no insistir y marcar "Sí".*

### SÓLO SI P38=1

60. El dolor de mano, ¿empeora al usar las manos/mover los dedos (tiene más dolor cuando trabaja con las manos o hace esfuerzo con las manos)?

0. No 1. Sí

*Nota: si indica que "a veces" o "parece que sí", no insistir y marcar "Sí".*

### SÓLO SI P38=1

61. ¿Mejora al usar las manos/mover los dedos (el dolor mejora después de un rato moviendo las manos)?

0. No 1. Sí

## Estudio de prevalencia de las enfermedades reumáticas en la población adulta en España

*Nota: si indica que “a veces” o “parece que sí”, no insistir y marcar “Sí”.*

*Nota: En caso de obtener la misma respuesta a las preguntas 60 y 61 (sí a las dos o no a las dos), confirmar con el entrevistado/a la comprensión de la pregunta.*

### SÓLO SI P38=1

62. ¿Mejora con el reposo (*mejora cuando tienes las manos quietas, sin hacer esfuerzos*)?

0. No 1. Sí

*Nota: si indica que “a veces” o “parece que sí”, no insistir y marcar “sí”.*

### SÓLO SI P36=1

63. ¿Le ocurre que por la mañana no puede mover la zona afectada o la encuentra rígida? (*es decir, cuando se levanta por la mañana siente rigidez y le cuesta mover las articulaciones. Le cuesta caminar durante un rato si el dolor es en caderas, rodillas o pies, y si es en las manos, le cuesta cerrarlas al levantarse*)

0. No 1. Sí

### SÓLO SI P63=1

64. ¿Durante más de media hora?

0. No 1. Sí

65. ¿Alguna vez ha tenido dolor e hinchazón de una o dos articulaciones que se le haya pasado completamente en 1-2 semanas (*es decir, tuvo el dolor durante 1 o 2 semanas y luego, desapareció, quedándose después de ese tiempo igual que antes de tener el dolor*)?

0. No 1. Sí

66. ¿Alguna vez ha tenido dolor e hinchazón del dedo gordo del pie que ha parado completamente en 1-2 semanas (*es decir, le ha aumentado el tamaño de alguno de los dedos gordos de los pies y ha tenido dolor intenso, estaba enrojecido y caliente, como si tuviera “fiebre” en el dedo*)?

0. No 1. Sí

67. ¿Se le ponen los dedos blancos o tienen cambios de coloración con el frío (*no nos referimos a frialdad en las manos o pies, sino a que se le pongan las manos moradas y/o pálidas o blancas con el frío o al meterlas en agua fría*)?

0. No 1. Sí

68. ¿Ha tenido alguna vez úlceras/lagas en la boca durante más de 2 semanas seguidas?

0. No 1. Sí

69. ¿Le han dicho alguna vez que tuviera anemia o leucocitos/glóbulos blancos bajos o plaquetas bajas (*¿le han dicho si tiene los glóbulos rojos o las “defensas” o las plaquetas bajas?*)? 0. No 1. Sí

*Nota: si el entrevistado dice que sí, preguntar si el médico le ha dicho la causa. Si se la ha dicho, marcar No en esta pregunta 69.*

70. ¿Le ha salido alguna vez una erupción/sarpullido en las mejillas o la nariz que le durara por lo menos 1 mes? 0. No 1. Sí

71. ¿Le sale una erupción/sarpullido en la piel después de estar al sol sin haber estado tanto tiempo como para quemarse (*no es que se ponga roja la piel porque usted sea muy sensible, sino que le salgan ronchas*)? 0. No 1. Sí

## Estudio de prevalencia de las enfermedades reumáticas en la población adulta en España

72. ¿Alguna vez ha tenido dolor en el pecho durante varios días al respirar hondo (*es decir, tiene dolor al respirar fuerte o al hinchar los pulmones y este dolor se ha mantenido durante varios días*)? 0. No 1. Sí

73. ¿Le han dicho alguna vez que tuviera o soltara proteínas en la orina (*o ha notado la orina con mucha espuma*)? 0. No 1. Sí

74. ¿Alguna vez se le ha caído el pelo en grandes cantidades en poco tiempo (*no nos referimos a una caída "normal" del pelo que puede suceder por temporadas al lavarse o peinarse, sino a la caída de mechones, incluso, al apenas tirarse del pelo*)? 0. No 1. Sí

75. ¿Alguna vez ha tenido una convulsión o ataque epiléptico? 0. No 1. Sí

76. ¿Tiene sequedad (*sensación como si no tuviese lágrimas la mayor parte del día*) en los ojos que le moleste a diario? 0. No 1. Sí  
*Nota: si la persona comenta que es tras operarse de miopía, marcar como "No".*

### SÓLO SI P76=1

77. ¿Desde hace más de 3 meses? 0. No 1. Sí

78. ¿Tiene sensación de arenilla o tierra en los ojos de forma repetida? 0. No 1. Sí

79. ¿Usa lágrimas artificiales más de 3 veces al día? 0. No 1. Sí

80. ¿Nota la boca seca (*tiene sensación de "boca pastosa" durante la mayor parte del día*) a diario? 0. No 1. Sí

### SÓLO SI P80=1

81. ¿Desde hace más de 3 meses? 0. No 1. Sí

82. Durante las comidas, ¿bebe con frecuencia para ayudarse a tragar (*es decir, le cuesta tragar alimentos sólidos y se tiene que ayudar de agua para que bajen*)? 0. No 1. Sí

83. ¿Ha tenido siendo adulto hinchazón de la parte lateral de la cara, como las paperas, de forma mantenida o repetida? 0. No 1. Sí

### SÓLO SI P28=1 o P34=1 o P37=1

84. ¿Le ha dicho su médico que tiene o ha tenido psoriasis (*lesiones en la piel rojas y escamosas que se localizan en los codos, rodillas, cuero cabelludo*)? 0. No 1. Sí

### SÓLO SI P28=1 o P34=1 o P37=1

85. ¿A algún familiar cercano (abuelos, padres, hermanos o hijos) le han diagnosticado psoriasis? 0. No 1. Sí 9. No sabe/no contesta

### SÓLO SI P28=1

86. ¿Le ha dicho su médico que tiene o ha tenido enfermedad inflamatoria intestinal (colitis ulcerosa/enfermedad de Crohn)? 0. No 1. Sí

### SÓLO SI P28=1

87. ¿A algún familiar cercano (abuelos, padres, hermanos o hijos) le han diagnosticado enfermedad inflamatoria intestinal/colitis ulcerosa/enfermedad de Crohn? 0. No 1. Sí 9. No sabe/no contesta

### SÓLO SI P28=1

88. ¿Le ha dicho su médico que tiene o ha tenido uveítis (*ponerse el ojo rojo y doloroso, que haya tenido que ir al oculista y que no fuese por infección*)? 0. No 1. Sí

### SÓLO SI P28=1



## Estudio de prevalencia de las enfermedades reumáticas en la población adulta en España

89. ¿A algún familiar cercano (abuelos, padres, hermanos o hijos) le han diagnosticado espondilitis anquilosante?

0. No 1. Sí 9. No sabe/no contesta

### SÓLO SI EDAD ≥ 40

90. ¿Sabe si su padre o su madre ha sufrido una fractura de cadera?

0. No 1. Sí

### SÓLO SI EDAD ≥ 40

91. ¿Está usted tomando o ha tomado cortisona, corticoides o prednisona?

0. No 1. Sí

### SÓLO SI P91=1

92. ¿Durante más de 3 meses seguidos? 0. No 1. Sí

### SÓLO SI EDAD ≥ 40

93. ¿Está en tratamiento con insulina? 0. No 1. Sí

### SÓLO SI EDAD ≥ 40

94. ¿Le ha dicho su médico que tiene osteogénesis imperfecta del adulto? 0. No 1. Sí

### SÓLO SI EDAD ≥ 40

95. ¿Le ha dicho su médico que tiene una enfermedad grave del hígado? 0. No 1. Sí

### SÓLO SI EDAD ≥ 40 y ES MUJER

96. ¿Podría decirme si tuvo la menopausia (o le operaron y le quitaron la matriz y los ovarios) antes de los 45 años? 0. No 1. Sí

### SÓLO SI EDAD ≥ 40

97. ¿Podría decirme cuántas bebidas alcohólicas suele consumir al día? (Codificar la respuesta en unidades de bebida (UBEs)) \_\_\_\_\_ Unidades

*Nota: Se refiere al consumo medio diario, lo que bebe, de media, cada día. Si el entrevistado/a afirma no beber alcohol o dice que no bebe a diario, codificar como "0".*

| Tipo de bebida                                             | Volumen             | UBEs |
|------------------------------------------------------------|---------------------|------|
| Vino                                                       | 1 vaso (100 cc)     | 1    |
|                                                            | 1 litro             | 10   |
| Cerveza                                                    | 1 caña (200 cc)     | 1    |
|                                                            | 1 litro             | 5    |
| Copas                                                      | 1 orujo (30 cc)     | 1    |
|                                                            | 1 carajillo (25 cc) | 1    |
|                                                            | 1 copa (50 cc)      | 2    |
|                                                            | 1 combinado (50 cc) | 2    |
|                                                            | 1 litro             | 40   |
| Generosos (jerez, oporto, manzanilla, madeira, marsala...) | 1 copa (50 cc)      | 1    |
|                                                            | 1 vermut (100 cc)   | 2    |
|                                                            | 1 litro             | 20   |

98. ¿Podría decirme cuánto pesa aproximadamente? \_\_\_\_\_ Kg

99. ¿Y cuánto mide aproximadamente? \_\_\_\_\_ cm

100. ¿Fuma usted?

## Estudio de prevalencia de las enfermedades reumáticas en la población adulta en España

*Nota: codificar en función de la respuesta ofrecida. Si ésta es afirmativa, preguntar si lo hace a diario (código 1) o no (código 2). En caso de ser negativa, preguntar si fumaba antes para determinar si es código 3 o 4*

|                                               |   |                           |   |                                           |   |
|-----------------------------------------------|---|---------------------------|---|-------------------------------------------|---|
| Fuma a diario                                 | 1 | Sí fuma, pero no a diario | 2 | No fuma actualmente, pero ha fumado antes | 3 |
| No fuma ni ha fumado nunca de manera habitual | 4 | No sabe/No contesta       | 9 |                                           |   |

101. ¿Podría decirme cuál es el mayor nivel de estudios que ha obtenido?

|                                                         |   |                                        |   |                                                    |   |
|---------------------------------------------------------|---|----------------------------------------|---|----------------------------------------------------|---|
| No sabe leer ni escribir                                | 1 | Educación primaria incompleta          | 2 | Educación primaria                                 | 3 |
| Primera etapa de enseñanza secundaria, con o sin título | 4 | Enseñanza bachillerato                 | 5 | Enseñanza profesional de grado medio o equivalente | 6 |
| Enseñanza profesional de grado superior o equivalente   | 7 | Estudios universitarios o equivalentes | 8 | No sabe/No contesta                                | 9 |

102. ¿Cuál es o era su última ocupación profesional? (codificado según CNO-11, hasta el nivel de tercer dígito) : \_\_\_\_\_

103. ¿Cuál es su país de nacimiento?

|                     |    |                                                                                                                                                                                                                                                                                                               |   |                         |   |
|---------------------|----|---------------------------------------------------------------------------------------------------------------------------------------------------------------------------------------------------------------------------------------------------------------------------------------------------------------|---|-------------------------|---|
| España              | 1  | Otro país de la Unión Europea (Alemania, Austria, Bélgica, Bulgaria, Chipre, Croacia, Dinamarca, Eslovaquia, Eslovenia, Estonia, Finlandia, Francia, Grecia, Países Bajos, Hungría, Irlanda, Italia, Letonia, Lituania, Luxemburgo, Malta, Polonia, Portugal, Reino Unido, República Checa, Rumanía y Suecia) | 2 | Resto de Europa         | 3 |
| África              | 4  | América del Norte                                                                                                                                                                                                                                                                                             | 5 | Centro América y Caribe | 6 |
| Sudamérica          | 7  | Asia                                                                                                                                                                                                                                                                                                          | 8 | Oceanía                 | 9 |
| No sabe/No contesta | 99 |                                                                                                                                                                                                                                                                                                               |   |                         |   |

104. ¿Cuál es su nacionalidad?

*Nota: en caso de contar con doble nacionalidad, indicar las dos.*

|            |   |                                                                                                                                                                                                                                                                                                               |   |                         |   |
|------------|---|---------------------------------------------------------------------------------------------------------------------------------------------------------------------------------------------------------------------------------------------------------------------------------------------------------------|---|-------------------------|---|
| Española   | 1 | Otro país de la Unión Europea (Alemania, Austria, Bélgica, Bulgaria, Chipre, Croacia, Dinamarca, Eslovaquia, Eslovenia, Estonia, Finlandia, Francia, Grecia, Países Bajos, Hungría, Irlanda, Italia, Letonia, Lituania, Luxemburgo, Malta, Polonia, Portugal, Reino Unido, República Checa, Rumanía y Suecia) | 2 | Resto de Europa         | 3 |
| África     | 4 | América del Norte                                                                                                                                                                                                                                                                                             | 5 | Centro América y Caribe | 6 |
| Sudamérica | 7 | Asia                                                                                                                                                                                                                                                                                                          | 8 | Oceanía                 | 9 |

**Estudio de prevalencia de las enfermedades reumáticas en la población adulta en España**

|          |    |                     |    |  |  |
|----------|----|---------------------|----|--|--|
| Apátrida | 10 | No sabe/No contesta | 99 |  |  |
|----------|----|---------------------|----|--|--|

## Estudio de prevalencia de las enfermedades reumáticas en la población adulta en España

Antes de terminar la entrevista me gustaría agradecerle su colaboración y el tiempo que nos ha dedicado e informarle que sus respuestas se recogerán en una base de datos cuyo responsable es la Sociedad Española de Reumatología. La información que nos ha facilitado será revisada por los investigadores del estudio. En su municipio participan los Dres (*incluir nombres incluidos en el listado del hospital en cuestión*), del Servicio de Reumatología del hospital (*incluir nombre del hospital en cuestión*)

Si usted ya está diagnosticado de alguna de las enfermedades reumáticas, los reumatólogos intentarán confirmarlo en su historia clínica o contactando con su médico. Si se sospechara por las respuestas del cuestionario que puede tener alguna enfermedad reumática, los doctores le llamarán por teléfono para poder valorar esa sospecha.

Asimismo, aunque en este cuestionario no haya referido síntomas de alguna de las enfermedades de interés, los Dres. podrían ponerse en contacto con usted para confirmar su ausencia.

El tratamiento, comunicación y cesión de sus datos se hará conforme a lo dispuesto por la Ley Orgánica de protección de datos de carácter personal. En todo momento, usted podrá acceder a sus datos, corregirlos o cancelarlos. Para ello, puede ponerse en contacto con la Sociedad Española de Reumatología (su dirección es: calle Marqués del Duero, nº 5, 28001, Madrid).

Usted puede decidir no participar, o, si acepta hacerlo, cambiar de parecer retirando el consentimiento en cualquier momento sin obligación de dar explicaciones.

S.1 ¿Ha comprendido la información que le hemos dado sobre el estudio?

1. Sí → **CONTINUAR**
2. No → **PASAR A S.1.1**

S.1.1 ¿Sobre cuál/es de los aspectos que le he comentado le surgen dudas?

**RESPUESTA ESPONTÁNEA. RESOLVER DUDAS Y RETOMAR EN S.2**

S.2 ¿Comprende que su participación es voluntaria?

1. Sí → **CONTINUAR**
2. No → **LEER INSTRUCCIÓN:** “Cómo le comentaba, la participación en este estudio es completamente voluntaria. Usted puede decidir no participar, o, si acepta hacerlo, cambiar de parecer retirando el consentimiento en cualquier momento sin obligación de dar explicaciones.

S.3 ¿Acepta que los reumatólogos e investigadores tengan acceso a sus datos de carácter personal, como nombre y teléfono?

1. Sí → **CONTINUAR**
2. No → **FIN ENTREVISTA**

S.4 ¿Acepta participar en este estudio?

1. Sí → **CONTINUAR**
2. No → **FIN ENTREVISTA**

Por favor, para que quede constancia, podría decir su nombre y apellidos:

## Estudio de prevalencia de las enfermedades reumáticas en la población adulta en España

Nombre \_\_\_\_\_

Apellidos (*recoger los dos apellidos*)

\_\_\_\_\_

Teléfono fijo \_\_\_\_\_

Teléfono móvil (si el sujeto accede a facilitarlo) \_\_\_\_\_

Fecha entrevista (dd/mm/aaaa)                      \_\_/\_\_/\_\_\_\_
